# Supplementary material
Source: Research Square preprint supplement (doi:10.21203/rs.3.rs-9796806/v1)

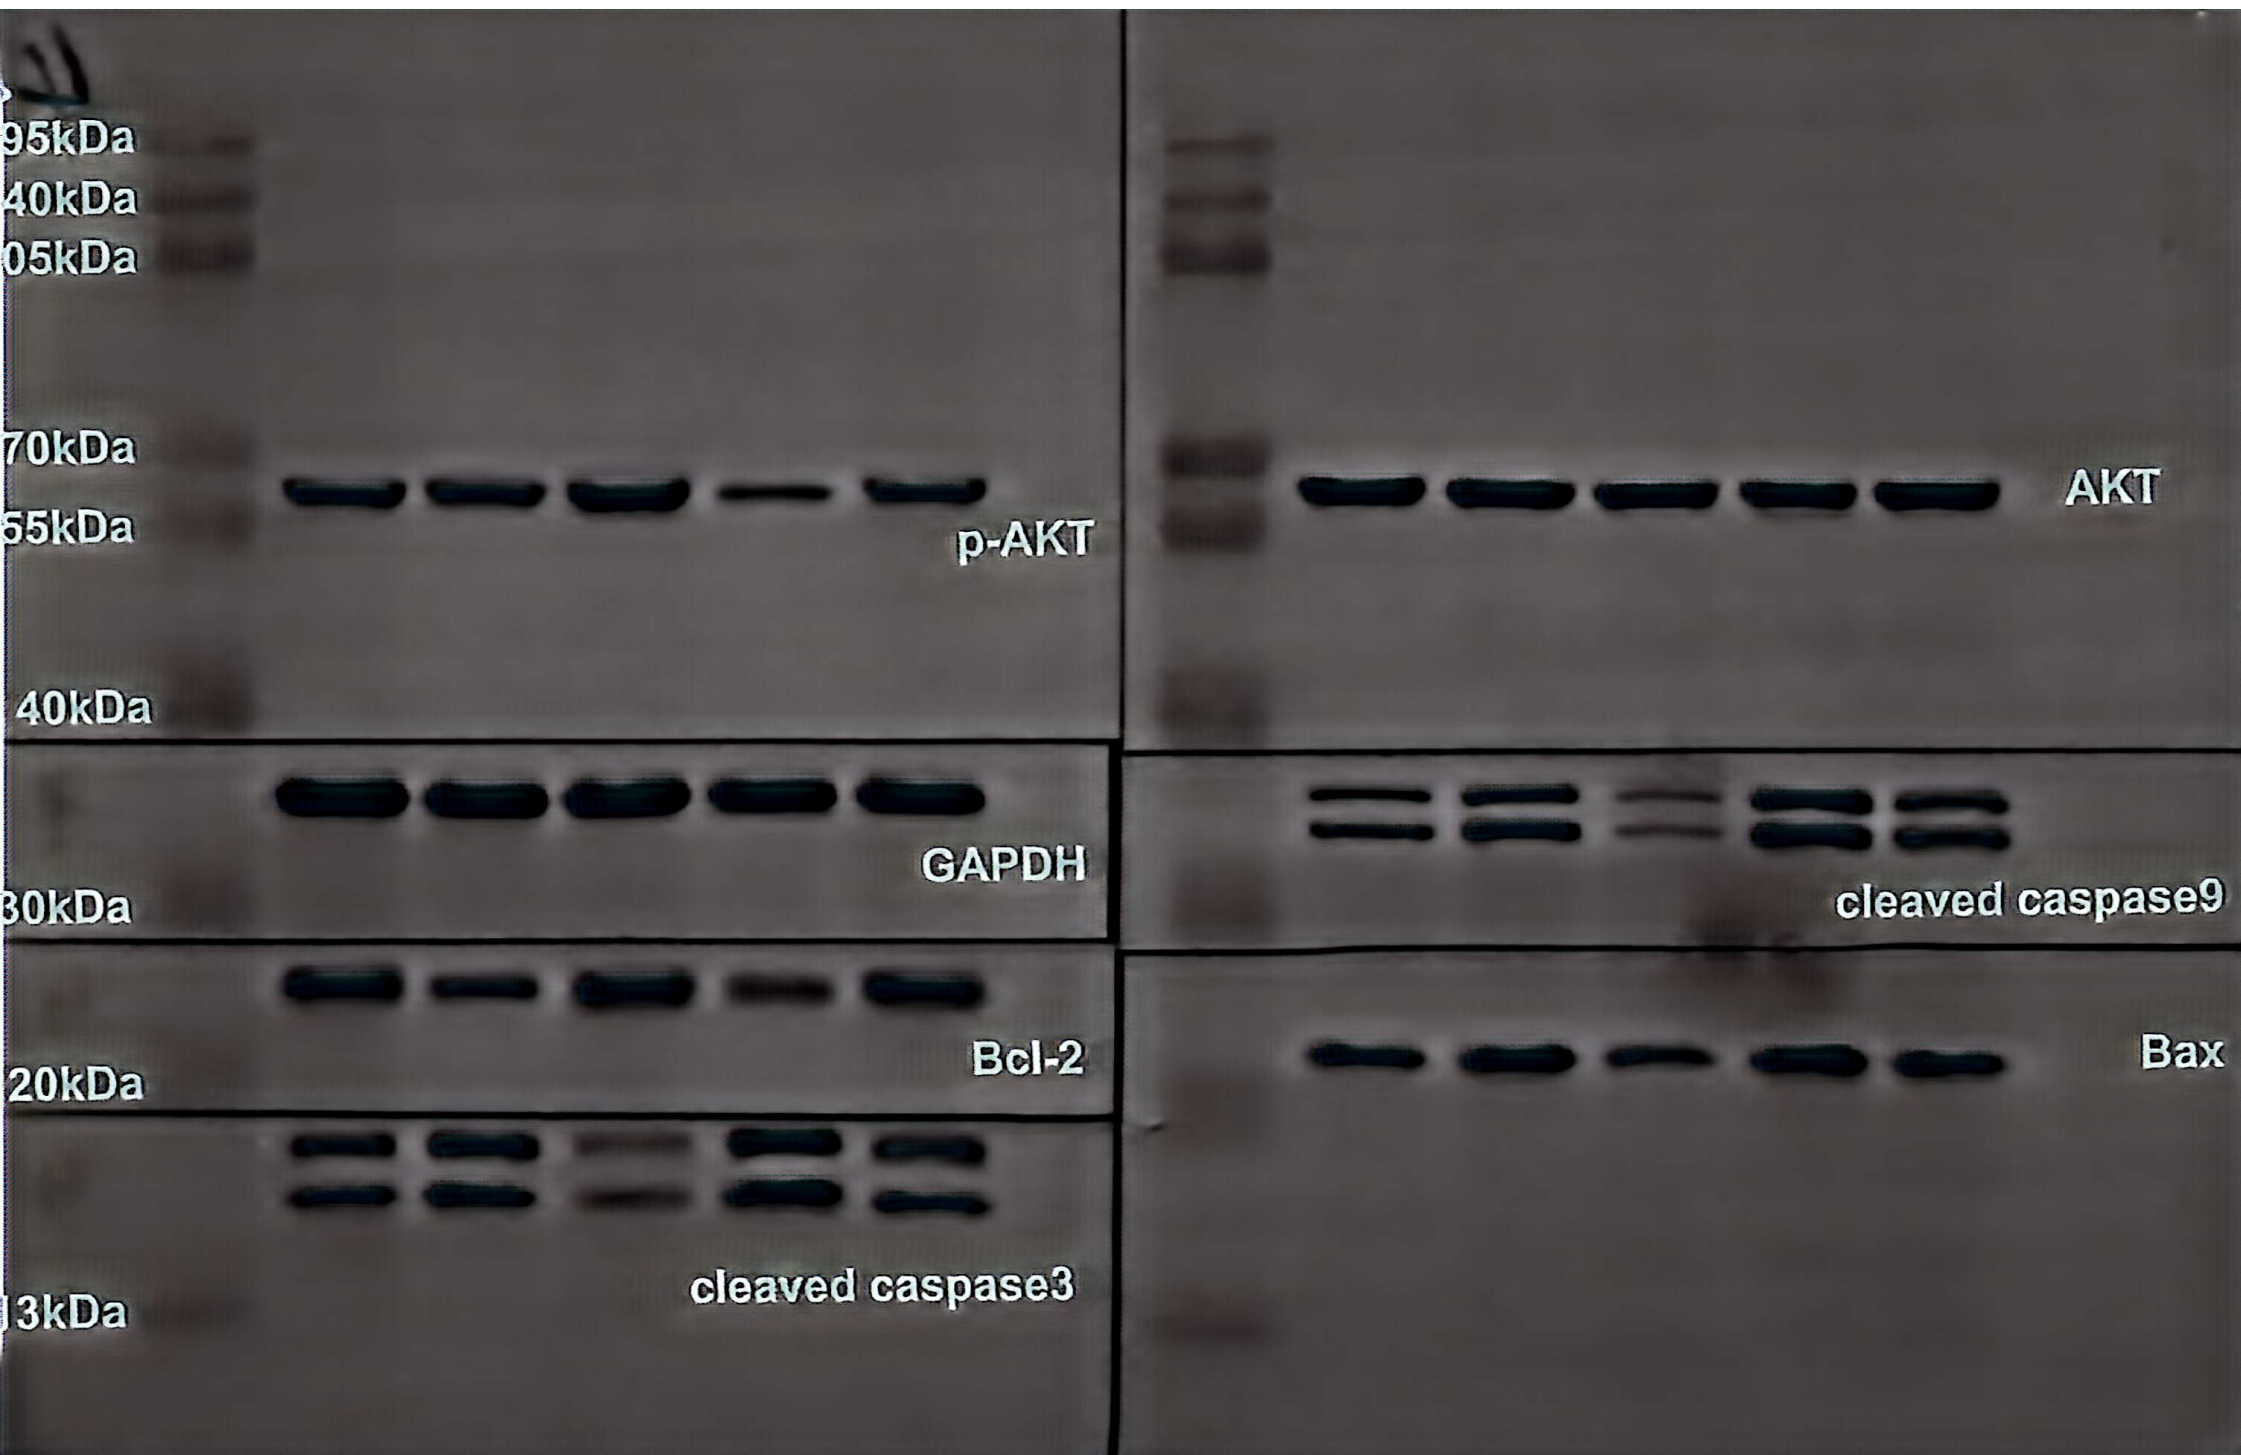

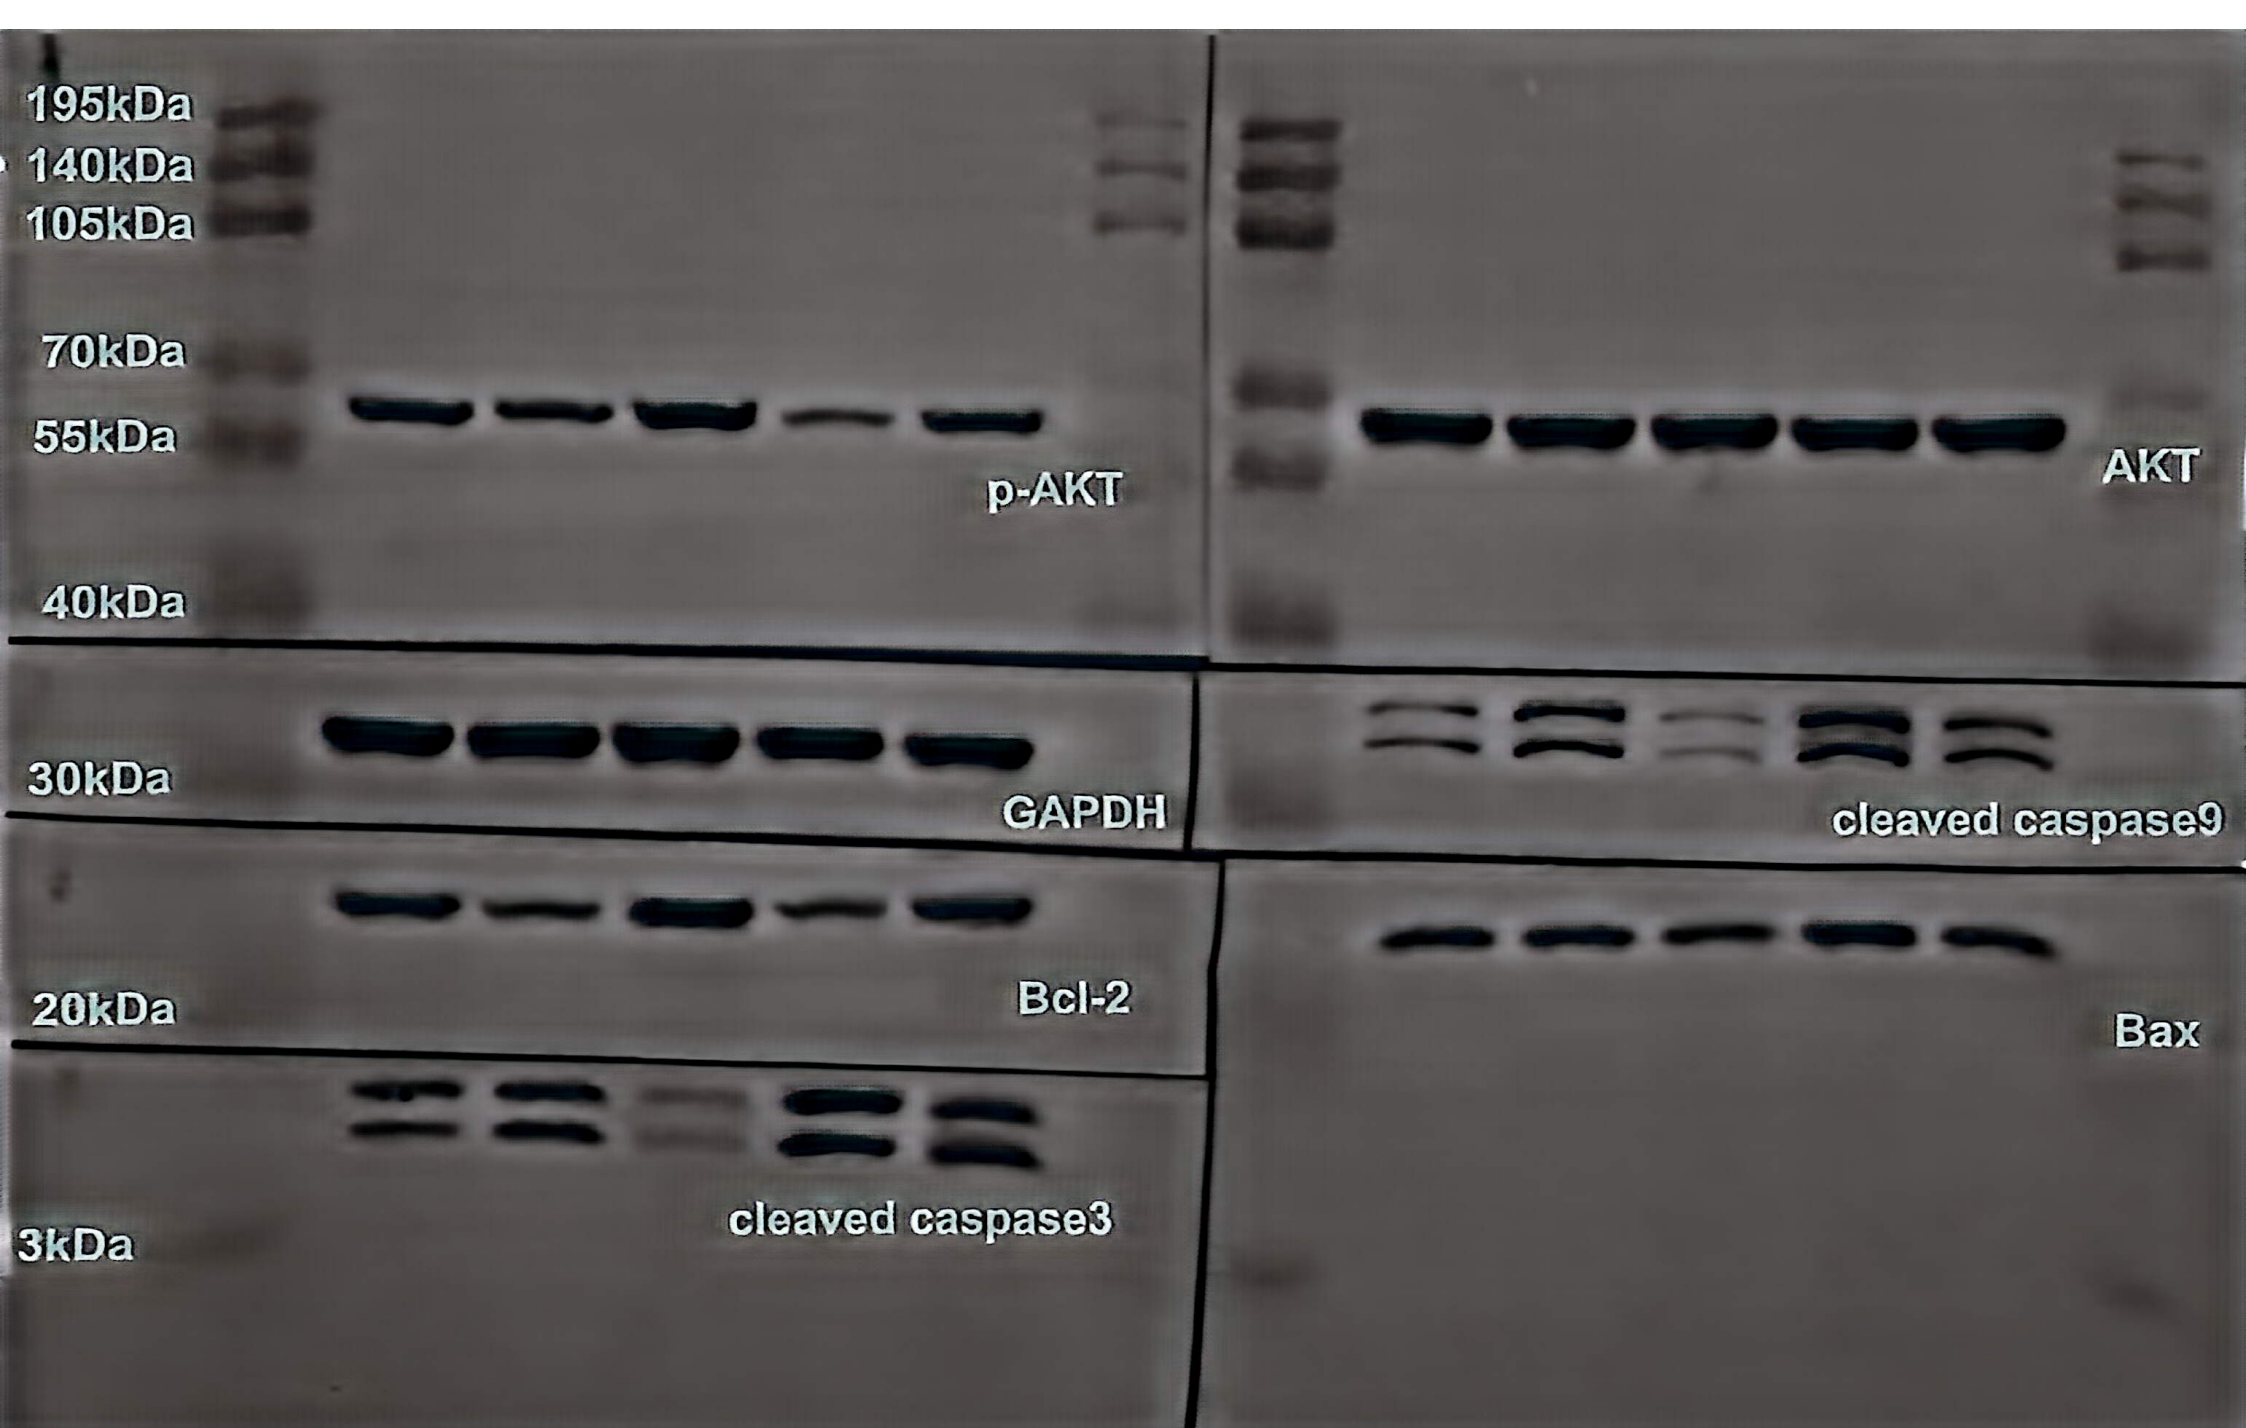

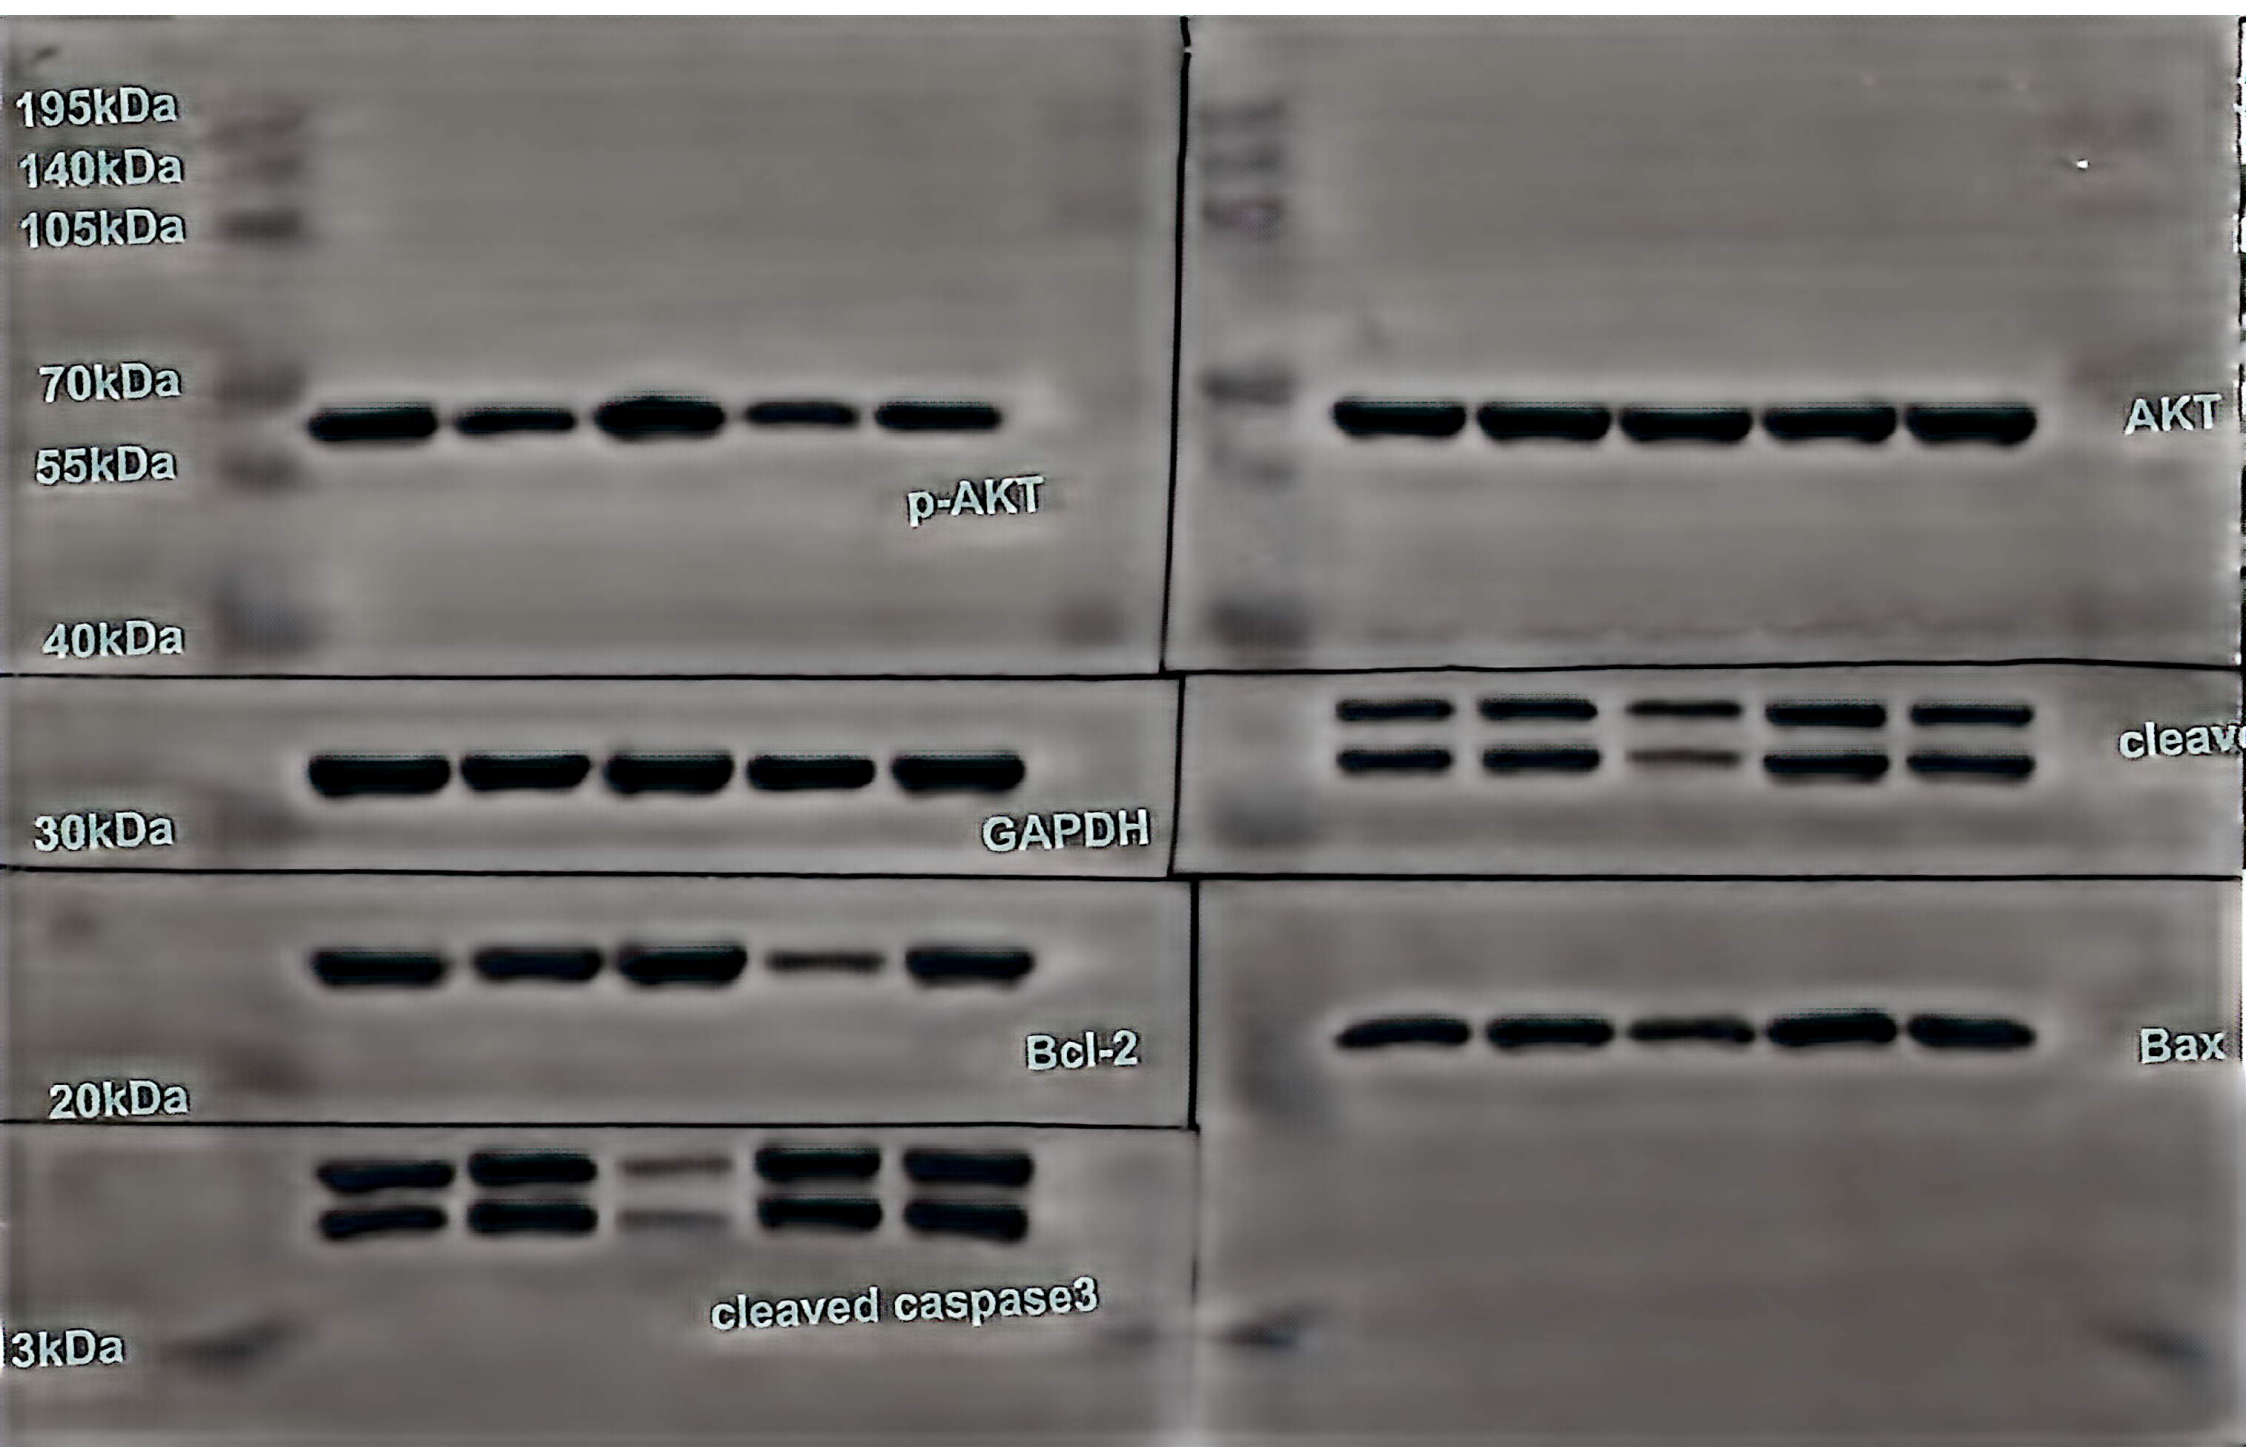

Supplement: Supplementary file 1 [file cce71d5c9c6e4c1a5d68b873.pdf]
